# Supplementary material for: The application of the Hub and Spoke Model in Antimicrobial Stewardship Programmes - A Scoping Review
Source: Preprints.org preprint supplement (doi:10.20944/preprints202409.0188.v1), 2024-09-03
Supplement: Supplementary file 1 [file supplementary]

Title:

The application of the Hub and Spoke Model in Antimicrobial Stewardship Programmes - A Scoping Review

Appendix A:

**Hub and spoke search strategy**

**Review aim:**

To identity and evaluate the application and implementation of HSM in AMS programmes

**Review question:**

Primary: How is the HSM model implemented within AMS programmes?

Secondary: What is the effectiveness of the HSM model in delivering interventions in AMS programmes?

**To develop the search strategy, the following steps were used:**

Define a research question

Identify key concept

Identify MeSH terms

Search for keywords

Find alternate search terms

Use truncation, boolean operators

Define search limits

| **Model** | **Aspect** | **Interventions-effectiveness** | **Key term 4** | **Intervention- implementations** | **Miscellaneous** |
| --- | --- | --- | --- | --- | --- |
| Hub and spoke | Antimicrobial | Knowledge | implementation | Adopt*ion | CFIR |
| Hub and spoke model | Antimicrobial stewardship | Training of healthcare professionals | barrier* | Implementation | Proctor et al |
| Hub-and-spoke model | Antibiotic stewardship | Establishment of ASP | facilitator* | Reach | RE-AIM |
| ECHO | AMS | Development of antibiogram | Barriers and facilitator* | effectiveness | Project ECHO |
| Hub and spoke network | Antimicrobial stewardship programme | Development of policies or guidelines | Barriers & facilitator* | adoption | Implementation frameworks |
| Star network | Healthcare | Pre- and post-intervention surveys   - Identification of pattern of use of medication - Change in classes of antibiotics used - Acceptability and feasibility by healthcare professionals of the hub and spoke model - Barriers to the application of the hub and spoke model | determinant* | maintenance | **One health**- Animals |
|  | Infection  Infectious / Infectious diseases |  | implement* | Accept*ability | health |
|  | Medicine* |  | challenge* | Penetration | Health care |
|  | Drug Resistance, Microbial |  | limit*ation | Sustain*ability | healthcare |
|  | Antimicrobial resistance |  | evaluation | Appropriat*eness | Health and social care |
|  | AMR |  | Program evaluation | Cost* |  |
|  | Antibiotic resistance |  |  | Feasibility |  |
|  |  |  |  | Fidelity |  |
|  |  |  |  | evaluation |  |

**Search criteria/limitation**

English language-

Inception- (no year filter)

Full papers

Excluding abstracts- IPC abstracting- needed full papers

| Inclusion Criteria | Exclusion Criteria |
| --- | --- |
| - AMS related articles that applied the HSM with an economic, clinical or humanistic outcome - Application of HSM in AMS context in both adult and/or pediatric populations - Application of HSM in antimicrobial prescribing/use - Studies discussing the application of HSM in AMS context (including protocols and commentaries) - Studies evaluating or exploring the barriers and facilitators of applying HSM in AMS context | - Articles focused on diagnosis of diseases, gene therapy, digital health and surgical outcomes - Studies conducted in a single setting - Studies focusing on veterinary medicine - Studies focusing only on educational activities e.g. ECHO training model |
